# Supplementary material for: Analysis of Genome-Wide Alternative Splicing Profiling and Development of Potential Drugs in Lung Adenocarcinoma
Source: Front Genet. 2021 Oct 19;12:767259. doi: 10.3389/fgene.2021.767259 (PMC8560713; doi:10.3389/fgene.2021.767259)
Supplement: Supplementary file 9 [file Table11.XLSX]

## Sheet: LUAD-SFgene-univariateCox
gene	HR	z	pvalue
SNW1	15.8094	3.62352	0.000290622
RBM8A	6.26882	3.08989	0.00200232
RNF34	3.31332	2.84111	0.00449564
TFIP11	3.28004	2.50296	0.0123161
PRPF3	2.36492	2.42325	0.0153821
PRMT5	2.50495	2.40837	0.0160241
MOV10	2.39603	2.40577	0.0161385
RNF213	1.86518	2.34908	0.0188199
DHX36	2.41425	2.34748	0.018901
HNRNPK	19.7718	2.3211	0.0202815
U2SURP	2.35289	2.31419	0.0206572
SSB	3.48603	2.30608	0.021106
INTS4	2.45018	2.27445	0.0229392
HNRNPH1	2.73686	2.26276	0.0236507
ZC3HAV1	2.49282	2.2276	0.0259074
DDX23	3.7648	2.1847	0.028911
INTS3	2.09766	2.16461	0.0304172
DHX9	4.12111	2.16276	0.0305596
HNRNPM	4.06273	2.15302	0.0313173
ZNF207	2.88826	2.14838	0.0316838
NCBP1	2.34431	2.14647	0.0318358
ZCCHC8	2.47134	2.13885	0.0324478
HNRNPR	3.29672	2.13182	0.0330214
DDX46	2.56967	2.09932	0.0357884
RBM25	2.10876	2.08938	0.0366735
HNRNPU	4.34254	2.07907	0.0376109
NONO	3.94978	2.07436	0.038046
CDK12	1.96704	2.06414	0.0390041
RBM45	2.82871	2.06294	0.0391185
IGF2BP3	1.21438	2.01279	0.0441365
CWC27	2.57723	1.95932	0.0500759
DDX42	2.75926	1.93329	0.0532005
SRSF9	2.76061	1.93254	0.0532928
PRPF40A	2.60079	1.92053	0.0547913
SF3B3	2.34803	1.90986	0.0561514
DHX8	2.49392	1.87196	0.0612116
PSEN1	3.18766	1.85306	0.0638734
SFPQ	3.08247	1.8449	0.0650526
CSN3	0.00390956	-1.82521	0.067969
BUD13	2.62192	1.81467	0.0695741
HSPA8	2.94168	1.8107	0.070187
ZC3H11A	2.02603	1.79664	0.0723928
PRPF4	2.27829	1.78854	0.0736888
PNN	1.903	1.78478	0.0742975
SF3A3	3.26318	1.78396	0.0744301
FUBP3	2.80632	1.77971	0.0751232
ZRSR1	2.30268	1.77743	0.0754969
SNRNP48	1.65402	1.7725	0.0763122
HNRNPA3	3.27433	1.772	0.0763943
ILF2	2.5053	1.74517	0.0809547
CLNS1A	2.33711	1.7364	0.0824939
NOVA1	1.30844	1.73544	0.0826624
DDX26B	1.41473	1.72955	0.0837108
SF3B2	3.03422	1.72704	0.08416
SRPK1	1.70059	1.7228	0.0849239
INTS7	1.80471	1.72272	0.0849399
SNRNP200	2.24816	1.70406	0.0883695
CPSF6	2.0332	1.70035	0.0890646
KHDRBS1	4.77606	1.69684	0.0897269
DDX17	2.41137	1.68523	0.0919438
ACIN1	2.00222	1.67547	0.0938414
PTBP3	2.13076	1.67288	0.0943514
RNF20	2.32368	1.66714	0.0954859
FUBP1	2.10421	1.65351	0.098227
GEMIN5	1.83479	1.65026	0.0988902
PPWD1	1.82127	1.64746	0.0994626
BCAS2	2.55783	1.63176	0.10273
HSPA1B	1.77968	1.62451	0.104266
RBMX	3.51115	1.62329	0.104528
HTATSF1	2.26358	1.61484	0.106345
CRNKL1	2.00918	1.604	0.108713
SNRNP40	2.13169	1.59777	0.110095
SNRPE	1.98193	1.58493	0.112982
IK	2.77032	1.58427	0.113133
HNRNPD	2.61067	1.57499	0.11526
CDC5L	2.07132	1.57208	0.115931
SNRPF	1.71462	1.56344	0.117948
RBFOX2	1.80048	1.54289	0.122857
WDR83	0.611688	-1.53284	0.125315
RBM23	2.26319	1.53102	0.125764
EFTUD2	2.14809	1.52723	0.126705
ZNF830	2.31196	1.51724	0.129207
AGGF1	1.99768	1.51415	0.129989
HNRNPC	3.20396	1.50784	0.131596
DNAJC6	1.27315	1.48216	0.138297
RBM15	1.60062	1.48158	0.138453
DHX15	2.10666	1.47742	0.139562
RBM14	2.31884	1.46069	0.144101
TAF15	1.84001	1.46063	0.144118
SPEN	1.54485	1.45681	0.145168
CCAR1	1.95492	1.45346	0.146095
SRSF1	3.44411	1.44892	0.14736
PTBP1	2.70211	1.44581	0.14823
SRRM1	2.00123	1.42983	0.152765
RBM22	2.7404	1.41228	0.157866
RNPC3	1.32679	1.41188	0.157986
DDX20	1.82154	1.39042	0.164401
KIAA1429	1.72923	1.37779	0.168267
PRPF8	1.98345	1.37379	0.169505
TCERG1	1.57961	1.37235	0.169955
DDX3Y	0.910006	-1.37231	0.169969
ZMYM3	1.67613	1.37184	0.170115
PRPF4B	1.84563	1.36929	0.170909
SF1	2.7296	1.36902	0.170993
SKIV2L2	1.80913	1.35618	0.175041
GPATCH8	1.66625	1.35361	0.175861
NCBP2	2.05943	1.34885	0.177384
EIF3A	1.89048	1.33737	0.181103
LSM10	0.598581	-1.33037	0.183397
THOC2	1.57864	1.31562	0.1883
PPIG	2.04364	1.31399	0.18885
ZNF326	1.45572	1.3126	0.189318
DDX5	2.79629	1.30778	0.190947
THRAP3	2.65076	1.28408	0.199116
CELF3	1.17777	1.28147	0.200027
CWC22	2.05463	1.27653	0.201769
SF3A1	2.01351	1.27289	0.203057
DDX27	1.6816	1.26772	0.204897
RBM15B	1.983	1.26428	0.206129
SRSF2	2.68317	1.26179	0.207025
DDX6	1.86342	1.26078	0.207386
PRPF38B	1.76487	1.25915	0.207975
RNU6-1	1.33313	1.25079	0.21101
HSPA5	2.284	1.2327	0.217688
CDC40	1.52165	1.23165	0.218081
LSM5	1.52697	1.21949	0.222658
SAP18	0.467008	-1.21581	0.224056
MATR3	1.26614	1.21383	0.224813
LSM8	1.51365	1.20336	0.228838
PLRG1	1.8659	1.19939	0.230375
HNRNPA2B1	2.50786	1.19871	0.230641
GRSF1	2.01638	1.19782	0.230988
HNRNPL	2.81972	1.19044	0.233874
SRSF10	1.83469	1.18781	0.23491
HNRNPDL	2.47235	1.15883	0.246526
EIF4A3	1.61667	1.1571	0.247231
SLU7	1.84263	1.15121	0.249648
MSI2	1.32444	1.14557	0.251972
TTC14	1.34032	1.14088	0.25392
NSRP1	1.68178	1.12838	0.259159
LENG1	0.718656	-1.12289	0.261486
ZC3H13	1.4871	1.1209	0.26233
TNPO1	1.54328	1.10106	0.270869
FUS	1.73272	1.09466	0.273665
HNRNPH3	1.8127	1.09264	0.274552
PRPF19	1.82539	1.09166	0.274981
PAXBP1	1.3486	1.08641	0.277296
THOC5	1.47923	1.08187	0.279309
PRPF40B	1.29502	1.07956	0.280337
HNRNPA1	2.53167	1.07914	0.280526
SRSF11	1.55204	1.07119	0.284085
DHX38	1.54363	1.0689	0.285115
WTAP	1.83083	1.06367	0.287479
CELF1	1.50797	1.0536	0.292064
SYF2	2.06088	1.04569	0.295705
SNRPA1	1.43252	1.04448	0.296262
ILF3	1.7428	1.03608	0.300167
WBP11	1.73279	1.03526	0.300547
HNRNPAB	1.88765	1.03361	0.301319
NUDT21	1.7682	1.03143	0.30234
RNF40	1.4799	1.03045	0.302797
RBM4	1.50612	1.02954	0.303225
SRRM2	1.45409	1.02883	0.303557
PPIE	1.52818	1.02423	0.305728
PRPF39	1.35935	1.02253	0.306531
SF3B1	2.02901	1.00653	0.314161
CXorf56	1.71917	1.00411	0.315324
JUP	1.44659	0.981461	0.326365
SRSF5	1.69449	0.954446	0.339858
C19orf43	0.576192	-0.951611	0.341295
HNRNPUL1	1.81963	0.947194	0.34354
SNRNP70	1.51108	0.944413	0.344959
LUC7L3	1.38089	0.932745	0.350952
C9orf78	1.74493	0.930195	0.35227
RBM3	0.575678	-0.928662	0.353064
GEMIN2	1.24377	0.927941	0.353438
LSM1	1.43876	0.92714	0.353854
ZC3H4	1.46929	0.923501	0.355746
PPIL2	1.38236	0.918907	0.358144
CWC25	1.59701	0.916328	0.359495
TXNL4A	0.676341	-0.915068	0.360156
PABPC1	1.74209	0.911512	0.362026
SRPK2	1.43307	0.909649	0.363007
TRA2B	1.64812	0.90853	0.363598
SYNCRIP	1.70755	0.906931	0.364443
SF3B4	1.50876	0.905541	0.365179
SREK1	1.30719	0.897463	0.369472
BUB3	1.48732	0.890182	0.373368
SNRNP35	1.45941	0.888497	0.374274
LUC7L2	1.47665	0.885281	0.376005
ZNF346	1.40299	0.884965	0.376175
SRSF6	1.8073	0.880162	0.378772
ALYREF	1.42237	0.871289	0.383596
HNRNPF	1.86796	0.85691	0.391495
SNIP1	1.53385	0.851784	0.394334
PPIL1	1.34506	0.83659	0.402823
RBM5	1.31606	0.825306	0.409198
HSPB1	0.769853	-0.81992	0.412262
XAB2	0.757658	-0.811631	0.417003
NKAP	1.5039	0.807123	0.419596
EIF2S2	1.74338	0.806641	0.419874
HNRNPUL2	1.40494	0.806409	0.420007
WDR77	1.4199	0.799428	0.424042
U2AF2	1.55944	0.79898	0.424302
UBL5	0.676343	-0.789498	0.429821
INTS1	1.26901	0.788766	0.430249
CCDC12	0.746505	-0.78795	0.430726
YBX1	0.528546	-0.787348	0.431078
RAVER2	1.18457	0.778252	0.43642
ZMAT5	0.789326	-0.777456	0.43689
ZMAT2	1.73168	0.776505	0.437451
PRPF38A	1.54031	0.770113	0.441233
MAGOH	1.44762	0.764462	0.444592
THOC1	1.23134	0.754558	0.450514
NRIP2	0.826503	-0.751486	0.45236
RBM4B	1.32238	0.748143	0.454374
ELAVL3	1.19023	0.734672	0.462539
DDX39B	1.17778	0.727627	0.466842
RBM47	1.40377	0.724919	0.468502
CCDC94	0.771164	-0.722097	0.470235
CELF2	1.1501	0.719855	0.471614
TOP1MT	0.830846	-0.710933	0.477126
C1QBP	1.33378	0.707701	0.479131
KHSRP	1.44475	0.702976	0.482071
ZFR	1.45472	0.702301	0.482492
SNRPB2	1.41232	0.701609	0.482923
PPM1G	1.4344	0.701498	0.482992
RALY	0.695011	-0.691258	0.489403
FAM32A	0.615434	-0.690171	0.490087
RBBP6	1.31255	0.68988	0.49027
DDX41	1.3791	0.683269	0.494437
SNRPD1	1.27041	0.682503	0.494921
DDX3X	1.45359	0.678501	0.497454
SNRPD3	1.4753	0.678017	0.497761
ZRSR2	1.27692	0.666811	0.504893
CELF4	1.14009	0.663651	0.506914
DHX16	1.36405	0.662381	0.507727
THOC3	1.17237	0.63255	0.527028
ARGLU1	1.21935	0.627697	0.530203
PUF60	0.793615	-0.622217	0.533799
SAP30BP	1.39068	0.619441	0.535626
PRPF18	0.723586	-0.613929	0.539263
PQBP1	0.807757	-0.607939	0.543228
SUGP1	0.752272	-0.60691	0.543911
SEC31B	1.11294	0.60683	0.543964
PCBP3	1.12101	0.604864	0.54527
CFAP20	0.739136	-0.60192	0.547227
ZNF131	1.20929	0.597373	0.550259
FAM58A	0.811054	-0.596917	0.550563
DDX21	1.23926	0.593724	0.552697
DDX18	1.35014	0.588147	0.556433
CELF5	1.12813	0.584153	0.559117
RBM27	1.28905	0.584092	0.559158
DHX57	1.23643	0.574689	0.565502
CLASRP	1.16403	0.563195	0.573302
HNRNPA0	1.38201	0.560778	0.574949
SRSF12	1.10611	0.560022	0.575465
SRSF7	0.671422	-0.557993	0.576849
NUMA1	1.21506	0.549468	0.582685
FRA10AC1	1.19121	0.542723	0.587321
CELF6	0.307424	-0.54006	0.589156
USP39	0.748029	-0.53561	0.592228
PPIL4	1.3455	0.534563	0.592952
SRPK3	0.933435	-0.532982	0.594046
ELAVL2	1.11949	0.530919	0.595475
U2AF1L4	0.883411	-0.530865	0.595512
RNU5A-1	1.05267	0.530216	0.595962
U2AF1	0.792099	-0.529403	0.596526
DDX19A	1.27883	0.52184	0.601782
AQR	1.22004	0.521413	0.602079
PTBP2	1.11964	0.518159	0.604347
ZCCHC10	1.24392	0.511681	0.608874
TRIM24	1.1617	0.503967	0.614285
SRSF4	0.724473	-0.492169	0.6226
SRRT	1.23474	0.478562	0.63225
SDE2	1.22681	0.472132	0.636833
RNU4-1	0.955021	-0.467142	0.640399
SF3B6	1.32482	0.465118	0.641847
CLK4	1.11567	0.460484	0.645169
EEF1A1	0.714955	-0.459482	0.645888
ELAVL1	1.37147	0.458031	0.64693
CLK2	1.16431	0.455831	0.648512
ZC3H18	1.19413	0.454978	0.649125
SNURF	1.1005	0.446169	0.655475
RBM17	0.796813	-0.443613	0.657322
PRPF6	1.26379	0.43454	0.663896
CDK11A	1.10458	0.430508	0.666826
MFAP1	1.25811	0.425846	0.67022
TIA1	1.14086	0.425645	0.670366
MSI1	0.954372	-0.423993	0.671571
ISY1	0.826902	-0.42215	0.672916
LSM4	0.84188	-0.416288	0.6772
RAVER1	1.11418	0.407899	0.683348
TIAL1	1.23681	0.406421	0.684433
ELAVL4	0.890987	-0.401897	0.68776
SF3B5	0.842258	-0.399569	0.689474
KHDRBS3	0.941231	-0.397039	0.691339
CWC15	1.24891	0.395983	0.692117
DDX19B	0.83509	-0.39496	0.692872
MFSD11	1.18135	0.393183	0.694184
RBM7	1.15495	0.389098	0.697204
ZCRB1	1.25149	0.386753	0.698939
PHF5A	1.19211	0.383603	0.701273
DHX34	1.11173	0.383241	0.701541
THOC6	0.8737	-0.38211	0.70238
GPKOW	1.19212	0.374305	0.708177
PRCC	1.19598	0.358774	0.719764
DGCR14	0.895598	-0.339849	0.73397
DNAJC8	1.27125	0.335817	0.737009
PRPF31	0.872735	-0.335731	0.737074
WBP4	0.845007	-0.330925	0.740701
SMU1	1.20699	0.327219	0.743502
GPATCH1	1.1059	0.321171	0.748081
DDX1	0.805439	-0.320961	0.74824
SNRNP27	0.818564	-0.320389	0.748674
MBNL1	1.13537	0.314301	0.753292
PPIH	1.1298	0.313694	0.753754
LSM7	0.899977	-0.311758	0.755225
PPP1R8	1.23453	0.306328	0.759355
CLK3	0.882569	-0.303642	0.761401
SRSF8	0.845006	-0.296369	0.766949
RNPS1	0.850595	-0.295151	0.767879
FAM50B	0.952243	-0.290636	0.77133
SNU13	0.841595	-0.288273	0.773138
SMNDC1	1.16434	0.286409	0.774565
BUD31	0.880687	-0.286261	0.774678
RBM26	1.10898	0.281778	0.778114
HSPA1A	0.917724	-0.280767	0.778889
TOPORS	1.12726	0.279789	0.77964
TRA2A	0.861992	-0.271662	0.785882
CACTIN	1.09171	0.26868	0.788176
FRG1	1.15234	0.266243	0.790052
DHX30	1.15453	0.265777	0.790411
DHX40	1.11408	0.257815	0.79655
FAM50A	1.10014	0.250888	0.801901
MYEF2	0.952361	-0.250595	0.802127
SNRPA	1.11669	0.248949	0.8034
RBMX2	1.12183	0.235246	0.814017
NOVA2	0.957861	-0.234641	0.814487
BCAS1	1.02319	0.232186	0.816394
SMN1	1.08279	0.231583	0.816862
CD2BP2	1.14538	0.230213	0.817926
MBNL2	1.09091	0.228421	0.819319
SNRPC	1.11135	0.226353	0.820927
GPATCH3	0.905791	-0.223431	0.8232
FMR1	0.918768	-0.222309	0.824073
LSM6	0.906664	-0.220191	0.825722
BAG2	1.0387	0.215006	0.829763
HNRNPH2	0.843735	-0.206548	0.836363
SNRPD2	1.09119	0.199911	0.84155
RBM42	0.931809	-0.19451	0.845776
SNRPB	1.08464	0.192631	0.847248
GNB2L1	0.888073	-0.191079	0.848464
DDX50	1.12194	0.190301	0.849073
PPIL3	1.07546	0.189749	0.849506
SNRPN	0.954858	-0.189151	0.849975
KIN	1.07564	0.18127	0.856156
SRSF3	0.856607	-0.17987	0.857255
INTS6	1.05611	0.178481	0.858345
CCDC130	0.94472	-0.177948	0.858764
PPP1CA	0.909695	-0.1778	0.85888
NOSIP	0.943665	-0.16429	0.869503
DHX35	0.941911	-0.16263	0.87081
RBM39	1.08	0.161233	0.87191
YBX3	0.937353	-0.153901	0.877688
PCBP4	0.955616	-0.150094	0.880691
PCBP1	0.914943	-0.148549	0.881909
PDCD7	1.09523	0.14418	0.885358
CLK1	0.95791	-0.136465	0.891454
CDK10	1.03727	0.134751	0.892808
CHERP	1.04556	0.133572	0.893741
RBM10	0.956619	-0.122715	0.902333
LSM2	1.04651	0.117881	0.906162
NELFE	1.05138	0.112054	0.91078
RBMXL1	1.03499	0.108961	0.913233
LSM3	0.943917	-0.10753	0.914369
DDX39A	1.03484	0.107167	0.914656
QKI	0.974424	-0.104258	0.916965
SNRPG	0.965034	-0.0957718	0.923702
MBNL3	0.981984	-0.0895634	0.928634
CIRBP	1.03116	0.0726622	0.942075
INTS5	1.03066	0.0721069	0.942517
TOE1	1.03067	0.0714197	0.943064
RNF113A	1.0252	0.0641818	0.948825
RNU1-1	1.01634	0.0623873	0.950254
LUC7L	1.01515	0.0581047	0.953665
PCBP2	0.960055	-0.0560901	0.95527
PSIP1	0.983394	-0.0539903	0.956943
CTNNBL1	1.0264	0.0533658	0.95744
SF3A2	0.984713	-0.0491524	0.960798
RBMXL2	1.06078	0.0450797	0.964044
RALYL	1.01714	0.0309337	0.975322
HNRNPCL1	1.02785	0.0282718	0.977445
SART1	1.00693	0.0193999	0.984522
RBMS1	0.994692	-0.014322	0.988573
SNRNP25	0.995858	-0.0132829	0.989402
RNU2-1	3.44e-51	-0.00949045	0.992428
THOC7	1.00437	0.00715243	0.994293
HNRNPLL	0.999713	-0.000613882	0.99951
