# Supplementary material for: Analysis of Genome-Wide Alternative Splicing Profiling and Development of Potential Drugs in Lung Adenocarcinoma
Source: Front Genet. 2021 Oct 19;12:767259. doi: 10.3389/fgene.2021.767259 (PMC8560713; doi:10.3389/fgene.2021.767259)
Supplement: Supplementary file 15 [file Table7.XLSX]

## Sheet: Sheet1
submitter_id	age_at_index	gender	race	ajcc_pathologic_stage	ajcc_pathologic_t	ajcc_pathologic_n	ajcc_pathologic_m
TCGA-35-3615	57	male	white	Stage IB	T2	N0	M0
TCGA-35-4122	69	male	white	Stage IA	T1	N0	M0
TCGA-35-4123	38	male	white	Stage IA	T1	N0	M0
TCGA-35-5375	61	male	white	Stage IIIA	T2	N2	M0
TCGA-38-4625	66	female	white	Stage IB	T2a	N0	M0
TCGA-38-4627	64	female	white	Stage IIA	T1b	N1	M0
TCGA-38-4628	65	female	white	Stage IIB	T2	N1	M0
TCGA-38-4629	68	male	white	Stage IIB	T3	N0	M0
TCGA-38-4630	75	female	white	Stage IB	T2	N0	M0
TCGA-38-4631	72	female	white	Stage IB	T2	N0	M0
TCGA-38-4632	42	male	black or african american	Stage IV	T2	N1	M1
TCGA-38-6178	70	female	white	Stage IIIA	T2b	N2	M1
TCGA-38-7271	72	female	white	Stage IA	T1	N0	M0
TCGA-38-A44F	80	male	white	Stage IB	T2a	N0	M0
TCGA-44-2655	65	female	white	Stage IA	T1	N0	M0
TCGA-44-2656	59	male	white	Stage IB	T2	N0	M0
TCGA-44-2657	74	female	white	Stage IB	T2	N3	M0
TCGA-44-2659	65	female	white	Stage IIB	T1	N1	M0
TCGA-44-2661	69	female	white	Stage IA	T1	N0	M0
TCGA-44-2662	65	male	white	Stage IB	T2	N0	M0
TCGA-44-2664	66	female	black or african american	Stage IA	T1	N0	M0
TCGA-44-2665	55	female	white	Stage IIB	T2	N1	M0
TCGA-44-2666	43	male	white	Stage IB	T2	N0	M0
TCGA-44-2668	51	male	white	Stage IB	T2	N0	M0
TCGA-44-3396	74	female	white	Stage IIIA	T2	N2	M0
TCGA-44-3398	77	female	white	Stage IA	T1b	N0	M0
TCGA-44-3917	33	female	white	Stage IB	T2	N0	M0
TCGA-44-3918	60	female	white	Stage IA	T1	N0	M0
TCGA-44-3919	71	female	white	Stage IA	T1	N0	M0
TCGA-44-4112	60	female	white	Stage IB	T2a	N0	M0
TCGA-44-5643	53	male	black or african american	Stage IIIA	T2b	N2	M0
TCGA-44-5644	51	female	white	Stage IB	T2a	N0	M1
TCGA-44-5645	61	female	black or african american	Stage IA	T1	N3	M1
TCGA-44-6144	58	male	white	Stage IA	T1a	N0	M0
TCGA-44-6145	62	female	white	Stage IA	T1	N0	M0
TCGA-44-6146	64	male	white	Stage IIB	T3	N0	M0
TCGA-44-6147	67	female	white	Stage IA	T1b	N3	M0
TCGA-44-6148	60	male	white	Stage IA	T1b	N0	M0
TCGA-44-6774	56	female	white	Stage IIIA	T1	N2	M0
TCGA-44-6775	72	female	white	Stage IB	T2a	N0	MX
TCGA-44-6776	60	female	white	Stage IA	T1	N0	MX
TCGA-44-6777	85	female	white	Stage IB	T2	N3	MX
TCGA-44-6778	59	male	black or african american	Stage IA	T1	N0	MX
TCGA-44-6779	50	female	white	Stage IIB	T2	N1	MX
TCGA-44-7659	70	male	white	Stage IA	T1b	N0	MX
TCGA-44-7660	72	male	white	Stage IB	T2	N0	MX
TCGA-44-7661	69	female	white	Stage IB	T2a	N0	M0
TCGA-44-7662	61	male	white	Stage IB	T2a	N0	MX
TCGA-44-7667	49	female	white	Stage IIB	T3	N0	MX
TCGA-44-7669	59	male	black or african american	Stage IIA	T1b	N1	MX
TCGA-44-7670	47	female	white	Stage IIA	T1b	N1	M0
TCGA-44-7671	64	male	black or african american	Stage IB	T2a	N0	M0
TCGA-44-7672	52	female	white	Stage IA	T1b	N0	M0
TCGA-44-8117	54	female	white	Stage IB	T2a	N0	M0
TCGA-44-8119	73	male	white	Stage IIB	T3	N0	M0
TCGA-44-8120	58	male	black or african american	Stage IB	T2a	N0	M0
TCGA-44-A479	73	female	black or african american	Stage IB	T2	N0	MX
TCGA-44-A47A	78	female	white	Stage IB	T2a	N0	MX
TCGA-44-A47B	79	male	white	Stage IB	T2a	N0	M0
TCGA-44-A47F	74	male	white	Stage IIB	T2b	N1	M0
TCGA-44-A47G	73	female	white	Stage IA	T1	N0	M0
TCGA-44-A4SS	73	male	white	Stage IA	T1b	N0	M0
TCGA-44-A4SU	67	female	white	Stage IA	T1a	N0	MX
TCGA-49-4486	72	male	white	Stage IA	T1	N0	M0
TCGA-49-4487	72	female	white	Stage IA	T1	N0	M0
TCGA-49-4488	74	female	white	Stage IA	T1	N0	MX
TCGA-49-4490	45	female	white	Stage IIIA	T3	N2	M0
TCGA-49-4494	77	male	white	Stage IIIA	T3	N2	M0
TCGA-49-4501	67	female	white	Stage IB	T2	N0	M0
TCGA-49-4505	61	female	white	Stage IIB	T2	N1	M0
TCGA-49-4506	68	female	white	Stage IIB	T2	N1	M0
TCGA-49-4507	73	female	white	Stage IIIA	T3	N1	M0
TCGA-49-4510	51	female	black or african american	Stage IIB	T2	N1	M0
TCGA-49-4512	69	female	white	Stage IIIA	T2	N2	MX
TCGA-49-4514	79	female	white	Stage IA	T1	N0	M0
TCGA-49-6742	70	male	white	Stage IIA	T2a	N1	M0
TCGA-49-6743	81	female	white	Stage IIIA	T1	N2	MX
TCGA-49-6744	64	female	white	Stage IIA	T2a	N1	MX
TCGA-49-6745	82	male	white	Stage IIIA	T2a	N2	M0
TCGA-49-6761	68	female	white	Stage IIIA	T1	N2	MX
TCGA-49-6767	46	female	white	Stage IIB	T3	N0	MX
TCGA-49-AAQV	63	female	black or african american	Stage II	T1	N1	MX
TCGA-49-AAR0	57	male	black or african american	Stage IA	T1	N0	MX
TCGA-49-AAR2	64	male	black or african american	Stage IB	T2	N0	MX
TCGA-49-AAR3	69	male	black or african american	Stage IIB	T2	N1	MX
TCGA-49-AAR4	51	male	black or african american	Stage IIIA	T2	N2	MX
TCGA-49-AAR9	61	male	black or african american	Stage IIB	T3	N0	MX
TCGA-49-AARE	51	female	black or african american	Stage IA	T1	N0	MX
TCGA-49-AARN	56	female	black or african american	Stage IA	T1	N0	MX
TCGA-49-AARO	39	female	black or african american	Stage IA	T1a	N0	MX
TCGA-49-AARQ	41	female	black or african american	Stage I	T2	N0	MX
TCGA-49-AARR	68	male	black or african american	Stage IA	T1	N0	MX
TCGA-4B-A93V	52	female	black or african american	Stage IA	T1b	N0	M0
TCGA-50-5044	72	female	white	Stage IIIB	T4	N1	M0
TCGA-50-5049	70	male	white	Stage IA	T2	N0	M0
TCGA-50-5051	42	female	white	Stage IIIA	T2	N2	M0
TCGA-50-5055	79	female	white	Stage IIA	T1	N1	M0
TCGA-50-5066	72	male	black or african american	Stage IB	T2	N0	M0
TCGA-50-5068	59	female	white	Stage IIB	T2	N1	MX
TCGA-50-5072	74	male	white	Stage IIIA	T2	N2	M0
TCGA-50-5930	47	male	white	Stage IIIA	T2	N2	M0
TCGA-50-5931	75	female	white	Stage IB	T2	N0	M0
TCGA-50-5932	75	male	white	Stage IIB	T2	N1	M0
TCGA-50-5933	72	male	white	Stage IIIB	T4	N2	M0
TCGA-50-5935	86	female	white	Stage IA	T1	N0	M0
TCGA-50-5936	58	male	white	Stage IIIA	T2	N2	M0
TCGA-50-5939	85	male	white	Stage IB	T2	N0	M0
TCGA-50-5941	55	female	white	Stage IIIA	T2a	N2	M0
TCGA-50-5942	67	female	white	Stage IA	T1	N0	M0
TCGA-50-5944	69	female	white	Stage IA	T1	N0	M0
TCGA-50-5946	62	male	white	Stage IA	T1	N0	MX
TCGA-50-6590	72	female	white	Stage IB	T2	N0	M0
TCGA-50-6591	63	female	white	Stage IV	T2	N0	M1
TCGA-50-6592	71	female	white	Stage IB	T2	N0	M0
TCGA-50-6593	49	female	white	Stage IIIA	T1	N2	M0
TCGA-50-6594	79	female	black or african american	Stage IIIA	T3	N2	M0
TCGA-50-6595	74	female	white	Stage IIIA	T2	N2	M0
TCGA-50-6597	79	female	white	Stage IB	T2	N0	M0
TCGA-50-6673	84	female	white	Stage I	T1	N0	M0
TCGA-50-7109	60	male	white	Stage IA	T1	N0	M0
TCGA-50-8457	63	female	black or african american	Stage IA	T1a	N0	M0
TCGA-50-8459	68	male	white	Stage IIB	T3	N0	M0
TCGA-50-8460	74	male	white	Stage IA	T1a	N0	M0
TCGA-53-7624	40	female	white	Stage IV	T2	N0	M1
TCGA-53-7626	76	female	white	Stage IIA	T1	N1	M0
TCGA-53-7813	51	female	white	Stage IIIB	T4	N0	M0
TCGA-53-A4EZ	63	male	white	Stage IIA	T2a	N1	MX
TCGA-55-1592	65	male	white	Stage IA	T2	N0	M0
TCGA-55-1594	68	male	white	Stage IIIA	T2	N2	M0
TCGA-55-1595	74	female	asian	Stage IA	T1	N0	M0
TCGA-55-1596	55	male	asian	Stage IIB	T2	N1	M0
TCGA-55-6543	60	female	white	Stage IA	T1b	N0	MX
TCGA-55-6642	63	male	white	Stage IB	T2	N0	MX
TCGA-55-6712	71	male	white	Stage IIA	T2a	N1	MX
TCGA-55-6968	61	male	white	Stage IV	T1	N0	M1
TCGA-55-6969	52	male	white	Stage IB	T2	N0	M0
TCGA-55-6970	67	female	white	Stage IIIA	T2	N2	MX
TCGA-55-6971	59	female	white	Stage IB	T2	N0	MX
TCGA-55-6972	72	male	white	Stage IB	T2	N0	M0
TCGA-55-6975	61	male	white	Stage IIB	T2	N1	M0
TCGA-55-6978	81	male	white	Stage IIA	T2b	N0	MX
TCGA-55-6979	59	female	white	Stage IIB	T2	N1	M0
TCGA-55-6980	56	male	white	Stage IA	T1	N0	M0
TCGA-55-6981	53	female	white	Stage IIIA	T1	N2	M0
TCGA-55-6982	79	female	white	Stage IIB	T2	N1	M0
TCGA-55-6983	81	male	white	Stage IIB	T2	N1	M0
TCGA-55-6984	71	female	white	Stage IIB	T2	N1	M0
TCGA-55-6985	58	female	white	Stage IB	T2	N0	MX
TCGA-55-6986	74	female	white	Stage IB	T2	N0	M0
TCGA-55-6987	77	male	white	Stage IA	T1	N0	M0
TCGA-55-7227	77	male	white	Stage IIIA	T3	N1	MX
TCGA-55-7281	70	female	white	Stage IA	T1b	N0	M0
TCGA-55-7283	76	female	white	Stage IIIA	T3	N2	MX
TCGA-55-7284	74	male	white	Stage IIB	T3	N0	MX
TCGA-55-7570	60	male	black or african american	Stage IA	T1a	N0	MX
TCGA-55-7573	72	female	white	Stage IA	T1b	N0	MX
TCGA-55-7574	64	female	white	Stage IB	T2a	N0	M0
TCGA-55-7576	54	male	black or african american	Stage IB	T2a	N0	M0
TCGA-55-7724	76	female	white	Stage IB	T2a	N0	MX
TCGA-55-7725	68	female	white	Stage IA	T1a	N0	MX
TCGA-55-7726	72	female	white	Stage IA	T1b	N0	MX
TCGA-55-7727	70	male	white	Stage IIIA	T1a	N2	MX
TCGA-55-7728	64	female	white	Stage IB	T2a	N0	MX
TCGA-55-7903	64	male	white	Stage IA	T1b	N0	MX
TCGA-55-7907	77	male	white	Stage IIA	T2a	N1	MX
TCGA-55-7910	50	female	black or african american	Stage IIA	T2b	N0	M0
TCGA-55-7911	70	female	white	Stage IA	T1a	N0	MX
TCGA-55-7913	61	female	black or african american	Stage IA	T1b	N0	MX
TCGA-55-7914	71	female	white	Stage IIA	T1b	N1	MX
TCGA-55-7994	81	male	white	Stage IIB	T3	N0	MX
TCGA-55-7995	73	female	white	Stage IA	T1b	N0	M0
TCGA-55-8085	64	male	white	Stage IA	T1b	N0	M0
TCGA-55-8087	59	female	white	Stage IB	T2a	N0	MX
TCGA-55-8089	56	male	white	Stage IA	T1a	N0	M0
TCGA-55-8090	80	male	white	Stage IA	T1a	N0	M0
TCGA-55-8091	74	male	white	Stage IB	T2	N0	MX
TCGA-55-8092	75	male	white	Stage IIB	T3	N0	MX
TCGA-55-8094	51	male	white	Stage IV	T2b	N0	M1b
TCGA-55-8096	67	female	white	Stage IB	T2a	N0	MX
TCGA-55-8097	60	female	white	Stage IA	T1a	N0	MX
TCGA-55-8203	69	female	white	Stage IA	T1b	N0	M0
TCGA-55-8204	87	female	white	Stage IB	T2a	N0	MX
TCGA-55-8205	76	female	white	Stage IIA	T2b	N0	M0
TCGA-55-8206	56	male	white	Stage IA	T1b	N0	M0
TCGA-55-8207	73	male	white	Stage IB	T2a	N0	MX
TCGA-55-8208	73	female	white	Stage IA	T1b	N0	M0
TCGA-55-8299	61	female	white	Stage IA	T1b	N0	MX
TCGA-55-8301	58	male	white	Stage IB	T2a	N0	MX
TCGA-55-8302	54	male	white	Stage IB	T2	N0	MX
TCGA-55-8505	62	male	white	Stage IIIA	T1a	N2	MX
TCGA-55-8506	62	female	white	Stage IIB	T3	N0	MX
TCGA-55-8507	53	male	white	Stage IA	T1a	N0	MX
TCGA-55-8508	60	female	black or african american	Stage IIA	T2a	N1	MX
TCGA-55-8510	55	female	white	Stage IB	T2a	N0	MX
TCGA-55-8511	73	female	white	Stage IB	T2a	N0	MX
TCGA-55-8512	41	male	white	Stage IV	T1a	N1	M1b
TCGA-55-8513	77	female	white	Stage IIB	T3	N0	MX
TCGA-55-8514	70	female	black or african american	Stage IB	T2a	N0	MX
TCGA-55-8614	76	male	white	Stage IB	T2a	N0	MX
TCGA-55-8615	67	male	white	Stage IIIA	T3	N2	MX
TCGA-55-8616	58	female	white	Stage IB	T2a	N0	M0
TCGA-55-8619	72	female	white	Stage IIB	T3	N0	MX
TCGA-55-8620	60	male	white	Stage IV	T1a	N1	M1b
TCGA-55-8621	75	female	white	Stage IA	T1a	N0	MX
TCGA-55-A48X	63	female	white	Stage IIA	T1b	N1	M0
TCGA-55-A48Y	69	male	white	Stage IIA	T2b	N0	M0
TCGA-55-A48Z	60	female	white	Stage IIIB	T1a	N3	MX
TCGA-55-A490	78	male	white	Stage IIA	T2b	N0	MX
TCGA-55-A491	81	female	white	Stage IA	T1b	N0	MX
TCGA-55-A492	70	female	white	Stage IA	T1a	N0	MX
TCGA-55-A493	54	female	white	Stage IB	T2a	N0	M0
TCGA-55-A494	61	female	white	Stage IB	T2a	N0	MX
TCGA-55-A4DF	88	male	white	Stage IA	T1b	N0	MX
TCGA-55-A4DG	71	male	white	Stage IA	T1b	N0	MX
TCGA-55-A57B	80	female	black or african american	Stage IA	T1b	N0	M0
TCGA-62-8394	65	female	white	Stage IIIB	T4	N2	M0
TCGA-62-8395	80	female	white	Stage IIB	T3	N0	M0
TCGA-62-8397	70	female	white	Stage IIB	T3	N0	M0
TCGA-62-8398	55	male	white	Stage IIIA	T2	N2	M0
TCGA-62-8399	62	male	white	Stage IIIA	T2	N2	M0
TCGA-62-8402	73	female	white	Stage IIIA	T2	N2	M0
TCGA-62-A46O	65	female	white	Stage IB	T2	N0	M0
TCGA-62-A46P	65	male	white	Stage IB	T2	N0	M0
TCGA-62-A46R	54	female	white	Stage IB	T2	N0	M0
TCGA-62-A46S	73	male	white	Stage IB	T2	N0	M0
TCGA-62-A46U	71	female	white	Stage IIB	T2	N1	M0
TCGA-62-A46V	78	female	white	Stage IB	T2	N0	M0
TCGA-62-A46Y	70	female	white	Stage IIIA	T2	N2	M0
TCGA-62-A470	84	male	white	Stage IB	T2	N0	M0
TCGA-62-A471	64	male	white	Stage IIB	T2b	N1	M0
TCGA-62-A472	70	male	white	Stage IIB	T3	N0	M0
TCGA-64-1676	58	male	white	Stage IA	T1a	N0	M0
TCGA-64-1677	77	female	white	Stage IIIA	T2	N2	M0
TCGA-64-1679	58	female	white	Stage IIIA	T1	N2	M0
TCGA-64-1680	63	male	white	Stage IV	T2a	N2	M1
TCGA-64-1681	61	female	white	Stage IA	T1	N0	M0
TCGA-64-5774	60	male	white	Stage IB	T2	N0	M0
TCGA-64-5775	71	male	white	Stage IIIA	T4	N0	M0
TCGA-64-5778	60	male	white	Stage IB	T2	N0	M0
TCGA-64-5779	61	male	white	Stage IIIA	T2	N2	M0
TCGA-64-5781	55	female	white	Stage IB	T2	N0	M0
TCGA-64-5815	74	male	white	Stage IIB	T2	N1	M0
TCGA-67-3770	70	female	white	Stage IA	T1	N0	M0
TCGA-67-3771	77	female	black or african american	Stage IA	T1	N0	M0
TCGA-67-3772	82	female	white	Stage IB	T2	N0	M0
TCGA-67-3773	84	female	white	Stage IB	T2	N0	M0
TCGA-67-3774	73	female	white	Stage IB	T2	N0	M0
TCGA-67-3776	57	female	white	Stage IIB	T2	N1	M0
TCGA-67-6215	52	female	white	Stage IB	T2a	N0	M0
TCGA-67-6216	57	female	white	Stage IA	T1a	N0	M0
TCGA-67-6217	73	female	white	Stage IIA	T2a	N1	M0
TCGA-69-7760	73	male	white	Stage IIB	T3	N0	M0
TCGA-69-7761	84	male	white	Stage IB	T2a	N0	MX
TCGA-69-7763	69	male	white	Stage IA	T1b	N0	M0
TCGA-69-7764	75	male	white	Stage IA	T1b	N0	M0
TCGA-69-7973	42	female	white	Stage IB	T2a	N0	M0
TCGA-69-7974	54	female	white	Stage IIIA	T2a	N2	MX
TCGA-69-7978	59	male	white	Stage IIB	T2b	N1	MX
TCGA-69-7979	71	female	white	Stage IB	T2a	N0	MX
TCGA-69-7980	70	female	white	Stage I	T1b	N0	M0
TCGA-69-8253	59	female	black or african american	Stage IIA	T1a	N1	MX
TCGA-69-8255	71	male	white	Stage IA	T1a	N0	M0
TCGA-69-8453	77	male	white	Stage IIB	T3	N0	MX
TCGA-69-A59K	60	female	black or african american	Stage IIB	T3	N0	M0
TCGA-71-6725	48	female	asian	Stage IB	T2	N0	M0
TCGA-71-8520	60	female	asian	Stage IB	T2	N0	M0
TCGA-73-4658	80	female	white	Stage IB	T2	N0	M0
TCGA-73-4659	66	male	white	Stage IIIA	T2	N2	M0
TCGA-73-4662	65	female	white	Stage IA	T1	N0	M0
TCGA-73-4666	52	female	white	Stage IV	T1	N0	M1
TCGA-73-4668	66	female	american indian or alaska native	Stage IIB	T2	N1	M0
TCGA-73-4670	69	female	white	Stage IV	T2	N0	M1
TCGA-73-4675	59	male	white	Stage IIIA	T3	N1	M0
TCGA-73-4676	45	male	white	Stage IIA	T2a	N1	M0
TCGA-73-7498	58	female	white	Stage IA	T1b	N0	M0
TCGA-73-7499	81	female	white	Stage IB	T2a	N0	M0
TCGA-73-A9RS	41	male	black or african american	Stage IIB	T3	N0	M0
TCGA-78-7143	62	female	white	Stage IB	T2	N0	M0
TCGA-78-7145	52	female	white	Stage IV	T4	N1	M1
TCGA-78-7146	71	female	white	Stage IIIA	T2	N2	M0
TCGA-78-7147	67	female	white	Stage IIB	T2	N1	M0
TCGA-78-7148	71	male	white	Stage IIB	T2	N1	M0
TCGA-78-7149	71	male	white	Stage IIIB	T4	N0	M0
TCGA-78-7150	59	male	white	Stage IIB	T2	N1	M0
TCGA-78-7152	65	male	white	Stage IB	T2	N0	M0
TCGA-78-7153	65	female	white	Stage IB	T2	N0	M0
TCGA-78-7154	72	male	white	Stage IIIA	T3	N2	M0
TCGA-78-7155	68	male	white	Stage IB	T2	N0	M0
TCGA-78-7156	62	male	white	Stage IV	T4	N1	M1
TCGA-78-7158	59	female	white	Stage IIIB	T4	N2	M0
TCGA-78-7159	60	female	white	Stage IA	T1	N3	M0
TCGA-78-7160	61	male	white	Stage IV	T4	N2	M1
TCGA-78-7161	69	female	white	Stage IIB	T3	N0	M0
TCGA-78-7162	75	male	white	Stage IA	T1	N0	M0
TCGA-78-7163	60	male	white	Stage IB	T2	N0	M0
TCGA-78-7166	84	male	white	Stage IIB	T2	N1	M0
TCGA-78-7167	77	male	white	Stage IV	T2	N0	M1
TCGA-78-7220	53	female	white	Stage IIIA	T2	N2	M0
TCGA-78-7535	45	male	white	Stage IB	T2	N0	M0
TCGA-78-7536	69	male	white	Stage IIIA	T2	N2	M0
TCGA-78-7539	75	female	white	Stage IIA	T2b	N0	M0
TCGA-78-7540	66	female	white	Stage IB	T2	N0	M0
TCGA-78-7542	56	male	white	Stage IB	T2	N0	M0
TCGA-78-7633	67	male	white	Stage IB	T2	N0	M0
TCGA-83-5908	59	female	white	Stage IA	T1	N0	M0
TCGA-86-6562	52	male	white	Stage IIA	T2a	N1	M0
TCGA-86-6851	73	female	white	Stage IIA	T1b	N1	M0
TCGA-86-7701	66	male	white	Stage IV	T2	N0	M1
TCGA-86-7711	70	male	white	Stage IIA	T2a	N1	M0
TCGA-86-7713	70	male	white	Stage IIA	T2b	N0	M0
TCGA-86-7714	61	female	black or african american	Stage IIIA	T1b	N2	M0
TCGA-86-7953	69	female	white	Stage IA	T1b	N0	M0
TCGA-86-7954	68	female	white	Stage IB	T2	N0	M0
TCGA-86-7955	62	male	white	Stage IB	T2a	N0	M0
TCGA-86-8054	61	male	white	Stage IIB	T2b	N1	M0
TCGA-86-8055	79	male	white	Stage IIA	T2a	N1	M0
TCGA-86-8056	63	female	white	Stage IIIA	T4	N0	M0
TCGA-86-8073	58	male	white	Stage IB	T2a	N0	M0
TCGA-86-8074	62	female	white	Stage IIA	T1b	N1	M0
TCGA-86-8075	66	female	white	Stage IB	T2	N0	M0
TCGA-86-8076	42	male	white	Stage IA	T1	N0	M0
TCGA-86-8278	63	female	white	Stage IIB	T2	N1	M0
TCGA-86-8279	46	male	white	Stage IIA	T2a	N1	M0
TCGA-86-8280	54	female	white	Stage IIA	T2b	N0	M0
TCGA-86-8281	75	male	white	Stage IA	T1	N3	M0
TCGA-86-8358	44	male	white	Stage IB	T2a	N0	M0
TCGA-86-8359	52	male	white	Stage IIIA	T3	N2	M0
TCGA-86-8585	57	male	white	Stage IB	T2a	N0	M0
TCGA-86-8668	61	female	white	Stage IA	T1b	N0	M0
TCGA-86-8669	64	male	white	Stage IA	T1b	N0	M0
TCGA-86-8671	72	female	white	Stage IIB	T2b	N1	M0
TCGA-86-8672	59	male	white	Stage IIB	T3	N0	M0
TCGA-86-8673	61	male	white	Stage IB	T2	N0	M0
TCGA-86-8674	50	male	white	Stage IIA	T2a	N1	M0
TCGA-86-A456	78	female	asian	Stage IA	T1a	N0	M0
TCGA-86-A4D0	48	male	white	Stage IIA	T2b	N0	M0
TCGA-86-A4JF	56	male	white	Stage IIB	T3	N0	M0
TCGA-86-A4P7	63	female	white	Stage IB	T2a	N0	M0
TCGA-86-A4P8	59	female	white	Stage IIIA	T1b	N2	MX
TCGA-91-6828	70	male	white	Stage IA	T1a	N0	M0
TCGA-91-6829	78	male	white	Stage IB	T2	N0	MX
TCGA-91-6830	65	female	white	Stage IIA	T1	N1	MX
TCGA-91-6831	66	male	white	Stage IB	T2	N0	MX
TCGA-91-6835	81	female	white	Stage IA	T1	N0	M0
TCGA-91-6836	52	female	white	Stage IB	T2	N0	MX
TCGA-91-6840	59	female	white	Stage IA	T1b	N0	M0
TCGA-91-6847	62	female	white	Stage IB	T2	N0	MX
TCGA-91-6848	59	male	white	Stage IIIA	T2	N2	MX
TCGA-91-6849	75	female	black or african american	Stage IIIA	T2	N2	MX
TCGA-91-7771	62	male	white	Stage IIB	T3	N0	MX
TCGA-91-8496	63	female	white	Stage IB	T2a	N3	MX
TCGA-91-8497	75	female	white	Stage IA	T1a	N0	MX
TCGA-91-8499	76	female	white	Stage IA	T1b	N0	MX
TCGA-91-A4BC	59	male	white	Stage IIA	T2b	N0	MX
TCGA-91-A4BD	78	male	white	Stage IIA	T1b	N1	MX
TCGA-93-7347	76	female	white	Stage IA	T1a	N0	MX
TCGA-93-7348	75	female	white	Stage IA	T1a	N0	MX
TCGA-93-8067	77	male	asian	Stage IB	T2a	N0	MX
TCGA-93-A4JN	71	male	white	Stage IV	T2a	N0	M1a
TCGA-93-A4JO	70	male	white	Stage IA	T1a	N0	MX
TCGA-93-A4JQ	49	male	white	Stage IA	T1b	N0	MX
TCGA-95-7039	54	female	white	Stage IIB	T3	N0	MX
TCGA-95-7043	63	female	white	Stage IA	T1a	N0	MX
TCGA-95-7562	71	male	black or african american	Stage IIA	T2a	N1	M0
TCGA-95-7567	61	male	white	Stage IIB	T2b	N1	M0
TCGA-95-7944	71	male	white	Stage IA	T1a	N0	M0
TCGA-95-7947	67	male	white	Stage IA	T1a	N0	M0
TCGA-95-7948	42	female	white	Stage IB	T2a	N0	M0
TCGA-95-8039	72	male	white	Stage IA	T1	N0	MX
TCGA-95-8494	67	male	white	Stage IIA	T2a	N1	M0
TCGA-95-A4VK	74	female	white	Stage IIIA	T2b	N2	M0
TCGA-95-A4VN	62	female	white	Stage IIA	T2a	N1	M0
TCGA-95-A4VP	66	female	white	Stage IIIA	T2b	N2	M0
TCGA-97-7546	76	female	white	Stage IA	T1	N0	MX
TCGA-97-7547	67	female	white	Stage IB	T2	N0	MX
TCGA-97-7552	70	male	white	Stage IB	T2	N0	MX
TCGA-97-7553	58	female	white	Stage IA	T1	N0	MX
TCGA-97-7554	83	female	white	Stage IIIA	T2a	N2	M0
TCGA-97-7937	65	male	white	Stage IB	T2a	N0	MX
TCGA-97-7938	76	female	white	Stage IA	T1a	N0	MX
TCGA-97-7941	72	female	white	Stage IA	T1b	N0	MX
TCGA-97-8171	81	male	asian	Stage IV	T2a	N2	M1a
TCGA-97-8172	75	female	white	Stage IB	T2a	N0	M0
TCGA-97-8174	67	male	white	Stage IIA	T2b	N0	M0
TCGA-97-8175	55	female	white	Stage IB	T2a	N0	M0
TCGA-97-8176	63	male	white	Stage IIIA	T3	N1	M0
TCGA-97-8177	59	female	white	Stage IB	T2a	N0	M0
TCGA-97-8179	72	male	white	Stage IA	T1a	N0	M0
TCGA-97-8552	55	female	white	Stage I	T1a	N0	MX
TCGA-97-A4LX	81	male	white	Stage IB	T2a	N0	M0
TCGA-97-A4M0	60	female	white	Stage IB	T2a	N0	M0
TCGA-97-A4M1	52	female	white	Stage IA	T1a	N0	M0
TCGA-97-A4M2	66	male	white	Stage IA	T1a	N0	M0
TCGA-97-A4M3	69	female	white	Stage IA	T1b	N0	M0
TCGA-97-A4M5	83	male	white	Stage IA	T1b	N0	M0
TCGA-97-A4M6	45	female	white	Stage IA	T1a	N0	M0
TCGA-97-A4M7	74	male	white	Stage IA	T1b	N0	M0
TCGA-99-7458	74	female	white	Stage IIIA	T4	N0	M0
TCGA-99-8025	72	female	black or african american	Stage IIIA	T3	N2	M0
TCGA-99-8028	50	female	black or african american	Stage IA	T1a	N0	M0
TCGA-99-8032	61	male	white	Stage IA	T1a	N0	M0
TCGA-99-AA5R	70	female	black or african american	Stage IA	T1a	N0	M0
TCGA-J2-8192	65	female	white	Stage IIA	T2a	N1	MX
TCGA-J2-8194	69	female	white	Stage IIB	T3	N0	MX
TCGA-J2-A4AD	61	female	white	Stage IA	T1a	N0	MX
TCGA-J2-A4AE	77	female	white	Stage IA	T1a	N0	MX
TCGA-J2-A4AG	66	female	white	Stage IA	T1b	N0	MX
TCGA-L4-A4E5	48	female	white	Stage I	T1	N0	M0
TCGA-L4-A4E6	67	male	white	Stage IA	T1	N0	M0
TCGA-L9-A443	63	female	white	Stage IA	T1a	N0	MX
TCGA-L9-A444	60	female	white	Stage IA	T1a	N0	MX
TCGA-L9-A50W	75	male	black or african american	Stage IIA	T1b	N1	MX
TCGA-L9-A5IP	40	female	black or african american	Stage IV	T3	N2	M1b
TCGA-L9-A743	56	male	black or african american	Stage IIA	T2a	N1	M0
TCGA-L9-A7SV	69	male	black or african american	Stage IIA	T2a	N1	M0
TCGA-L9-A8F4	64	female	black or african american	Stage IB	T2a	N0	MX
TCGA-MN-A4N1	60	male	black or african american	Stage IIA	T2a	N1	M0
TCGA-MN-A4N4	57	male	white	Stage IA	T1b	N0	M0
TCGA-MN-A4N5	63	male	white	Stage IA	T1a	N0	M0
TCGA-MP-A4SW	53	male	white	Stage IIB	T2	N1	M0
TCGA-MP-A4SY	61	male	white	Stage IIB	T2	N1	M0
TCGA-MP-A4T2	71	male	white	Stage IA	T1	N0	M0
TCGA-MP-A4T4	68	female	white	Stage IIB	T2	N1	M0
TCGA-MP-A4T6	76	female	white	Stage IIIA	T1	N2	MX
TCGA-MP-A4T9	54	female	white	Stage IIIA	T2	N2	MX
TCGA-MP-A4TA	75	female	white	Stage IA	T1	N0	M0
TCGA-MP-A4TC	77	male	white	Stage IIIA	T1	N2	M0
TCGA-MP-A4TD	71	male	white	Stage IIIA	T2	N2	M0
TCGA-MP-A4TE	56	male	white	Stage IIA	T2b	N0	MX
TCGA-MP-A4TF	58	female	white	Stage IIA	T2b	N0	M0
TCGA-MP-A4TH	70	female	white	Stage IA	T1a	N0	M0
TCGA-MP-A4TI	72	male	white	Stage IIA	T2a	N1	M0
TCGA-MP-A5C7	76	female	white	Stage IB	T2	N0	M0
TCGA-NJ-A4YF	50	female	black or african american	Stage IA	T1	N0	M0
TCGA-NJ-A4YG	65	male	white	Stage IB	T2	N0	M0
TCGA-NJ-A4YI	87	female	white	Stage IIIA	T2	N2	M0
TCGA-NJ-A4YP	52	male	white	Stage IB	T2a	N0	M0
TCGA-NJ-A4YQ	69	female	white	Stage IA	T1b	N0	M0
TCGA-NJ-A55A	76	female	white	Stage IB	T2	N0	M0
TCGA-NJ-A55O	56	female	white	Stage IIA	T1b	N1	M0
TCGA-NJ-A55R	67	male	white	Stage IA	T1b	N0	MX
TCGA-NJ-A7XG	49	male	black or african american	Stage IIIA	T4	N1	M0
TCGA-O1-A52J	74	female	white	Stage IA	T1	N0	MX
TCGA-S2-AA1A	68	female	black or african american	Stage IA	T1b	N0	M0
